# Supplementary material for: Upregulation of ALDH1B1 promotes tumor progression in osteosarcoma
Source: PubMed Central journal article supplement (PMC5788655; doi:10.18632/oncotarget.23506), 2017-12-20
Supplement: oncotarget-09-2502-s001.pdf [file oncotarget-09-2502-s001.pdf]

## Upregulation of ALDH1B1 promotes tumor progression in osteosarcoma

### SUPPLEMENTARY MATERIALS

**Supplementary Table 1: Cell lines used in this study**

| Cell lines | Type                     | Source              |
|------------|--------------------------|---------------------|
| MG63       | Osteosarcoma cancer cell | ATCC, USA           |
| U2OS       | Osteosarcoma cancer cell | ATCC, USA           |
| SAOS       | Osteosarcoma cancer cell | ATCC, USA           |
| HFOB       | human osteoblast cells   | Heidelberg, Germany |
| HOBC       | human osteoblast cells   | FDCC, China         |

**Supplementary Table 2: Information on antibodies used in this study**

| Antibody       | WB     | IHC   | Specificity       | Company            |
|----------------|--------|-------|-------------------|--------------------|
| $\beta$ -actin | 1:2000 | /     | Mouse monoclonal  | Sigma.USA          |
| ALDH1B1        | 1:1000 | 1:100 | Rabbit Polyclonal | Proteintech, China |
| Ki-67          | /      | 1:100 | Mouse monoclonal  | Proteintech, China |
| Caspase-3      | 1:500  | /     | Rabbit Polyclonal | Proteintech, China |
| Caspase-9      | 1:500  | /     | Rabbit Polyclonal | Proteintech, China |

**Supplementary Table 3: siRNA and shRNA Sequence used in this study**

| Name             | sequence                                                                          |
|------------------|-----------------------------------------------------------------------------------|
| ALDH1B1-siRNA    | sense sequence<br>5'CCAGCUGUUCAACAACAAUTT3'                                       |
|                  | anti-sense sequence<br>5'AUUGUUGAUGAACAGCUGGTT3'                                  |
| ALDH1B1-NC siRNA | sense sequence<br>5'CCAGUUUACCUAACGCAAUTT3'                                       |
|                  | anti-sense sequence<br>5'AUUGCGUUAGGUAAACUGGTT3'                                  |
| ALDH1B1-shRNA-1  | sense sequence<br>5'CACCGGCAAGATGCAGTCAGCAAGAC<br>GAATCTTGCTGACTGCATCTTGCC3'      |
|                  | anti-sense sequence<br>5'AAAAGGCAAGATGCAGTCAGCAAGATTCGT<br>CTTGCTGACTGCATCTTGCC3' |
| ALDH1B1-shRNA-2  | sense sequence<br>5'CACCGGTCATGCAGGGTTGGAAACTCGAAA<br>GTTTCCAACCCTGCATGACC3'      |
|                  | anti-sense sequence<br>5'AAAAGGTCATGCAGGGTTGGAAACTTTCGAG<br>TTTCCAACCCTGCATGACC3' |
| ALDH1B1-shRNA-3  | sense sequence<br>5'CACCGCACGTGGATGTTGACAAAGTCGAAACTTT<br>GTCAACATCCACGTGC3'      |
|                  | anti-sense sequence<br>5'AAAAGCACGTGGATGTTGACAAAGTTTCGACTT<br>TGCAACATCCACGTGC3'  |
